# Supplementary material for: Ring–chain tautomerism and protolytic equilibria of 3-hydroxy-3-phosphonoisobenzofuranone studied by 1H, 13C and 31P NMR-controlled titrations
Source: Royal Society of Chemistry journal article supplement (doi:10.1039/b800450c), 2008-01-01
Supplement: b800450c.pdf [file b800450c.pdf]

## SUPPLEMENTARY INFORMATION FOR

### Ring-chain tautomerism and protolytic equilibria of 3-hydroxy-3-phosphonoisobenzofuranone studied by $^1\text{H}$ , $^{13}\text{C}$ , and $^{31}\text{P}$ NMR-controlled titrations

Sven Augner,<sup>a</sup> Jan Kehler,<sup>b</sup> Zoltán Szakács,<sup>a,c</sup> Eli Breuer,<sup>b\*</sup> and Gerhard Hägele<sup>a\*</sup>

<sup>a</sup>*Inorganic Chemistry and Structural Chemistry, Heinrich-Heine-University Düsseldorf, Universitätsstrasse 1, D-40225-Düsseldorf, Germany. Phone +49-211-81-13166. Fax +49-211-81-11854. Email: haegele@uni-duesseldorf.de*

<sup>b</sup>*Department of Medicinal Chemistry and Natural Products, School of Pharmacy, The Hebrew University of Jerusalem, P.O.B. 12065, Jerusalem 91120, Israel. Phone +972-2-675-8704, Fax +972-2-675-8934. Email: eli.breuer@huji.ac.il*

<sup>c</sup>*Laboratory for Speciation, Drug and Trace Analysis, Institute of Chemistry, Eötvös Loránd University, Pázmány Péter sétány 1/A, H-1117 Budapest, Hungary. Email: szakacs@chem.elte.hu*

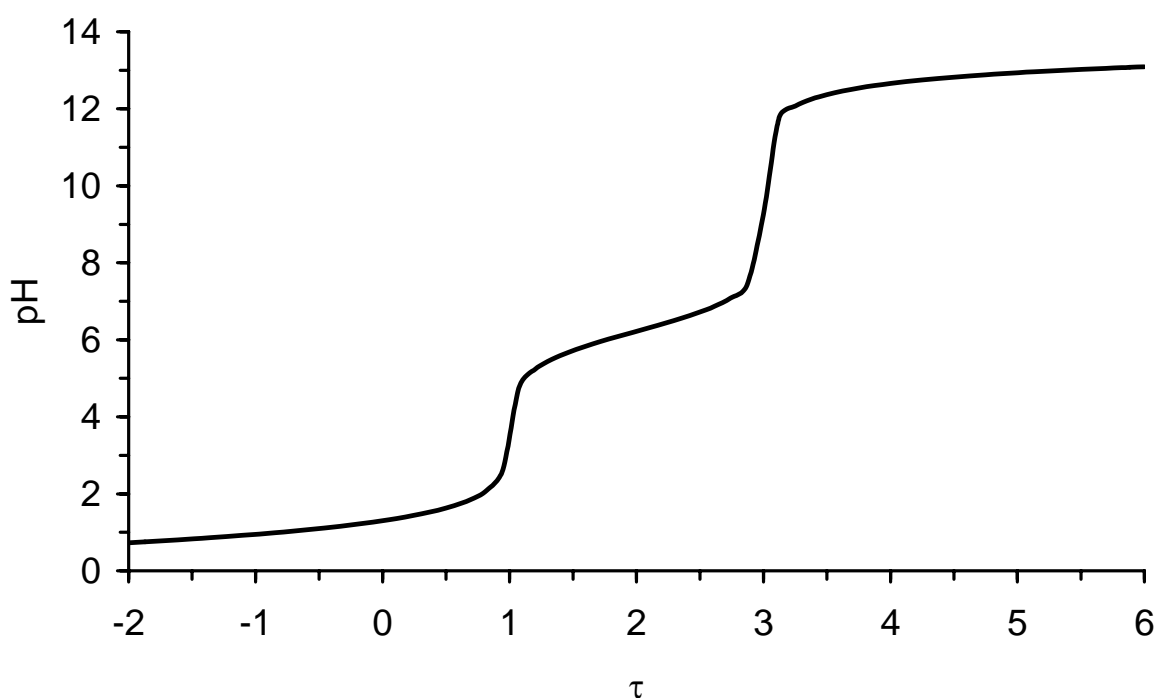

**Fig. S1.** Potentiometric pH, $\tau$ -titration curve of 3-hydroxy-3-phosphonoisobenzofuranone **6** with TMAOH at 1 M ionic strength (TMACl)

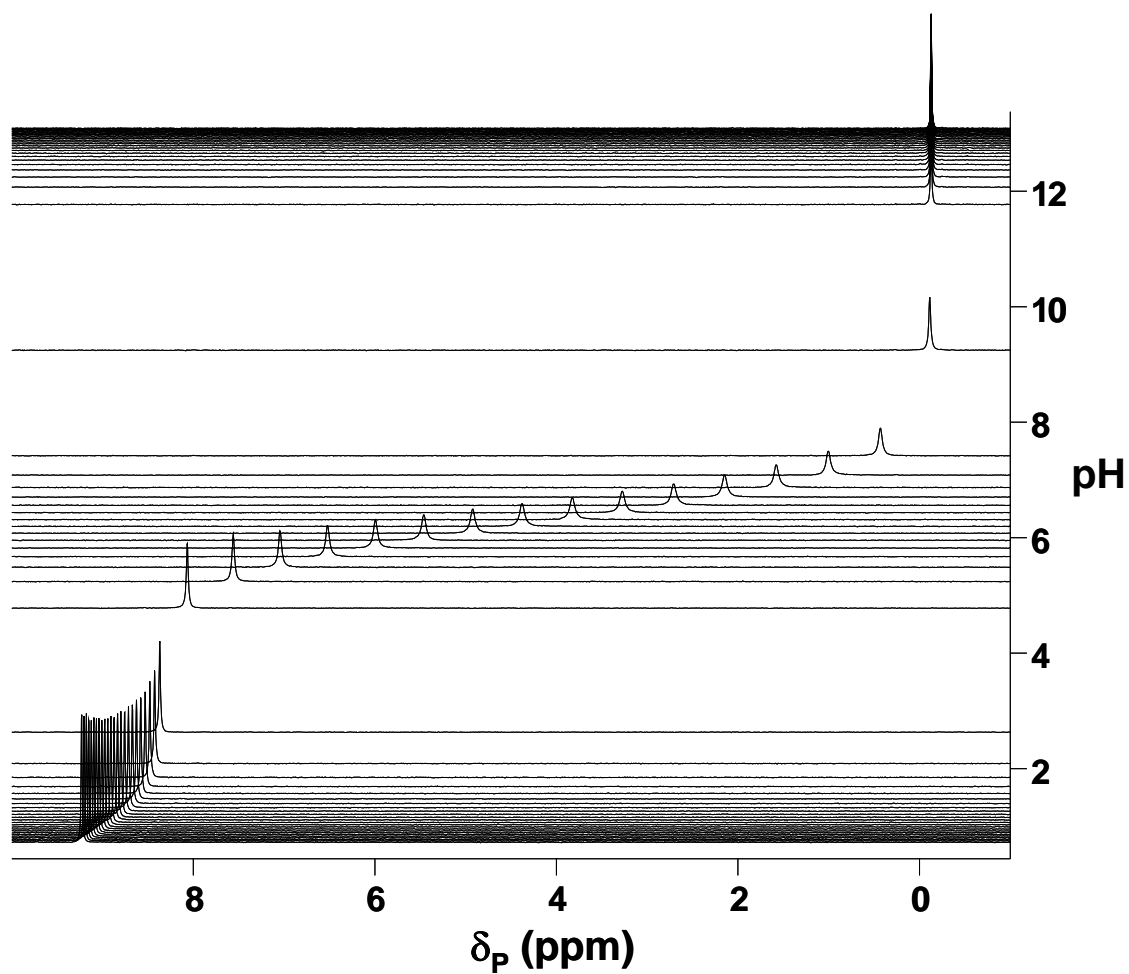

**Fig. S2.** 202 MHz  $^{31}\text{P}\{^1\text{H}\}$  NMR-controlled titration of **6** with 1 M TMAOH.

Stacked pH, $\delta$ -plot

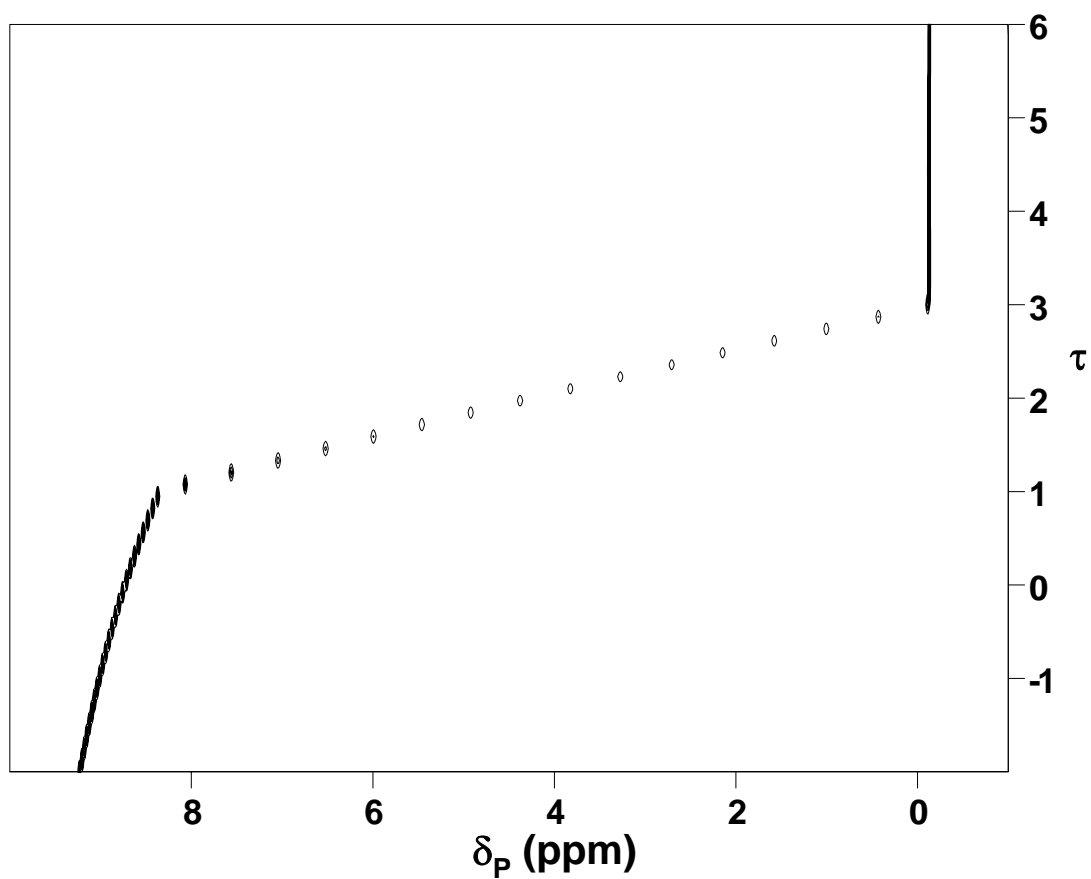

**Fig. S3.** 202 MHz  $^{31}\text{P}\{^1\text{H}\}$  NMR-controlled titration of **6** with 1 M TMAOH.  
Contour  $\tau, \delta$ -plot

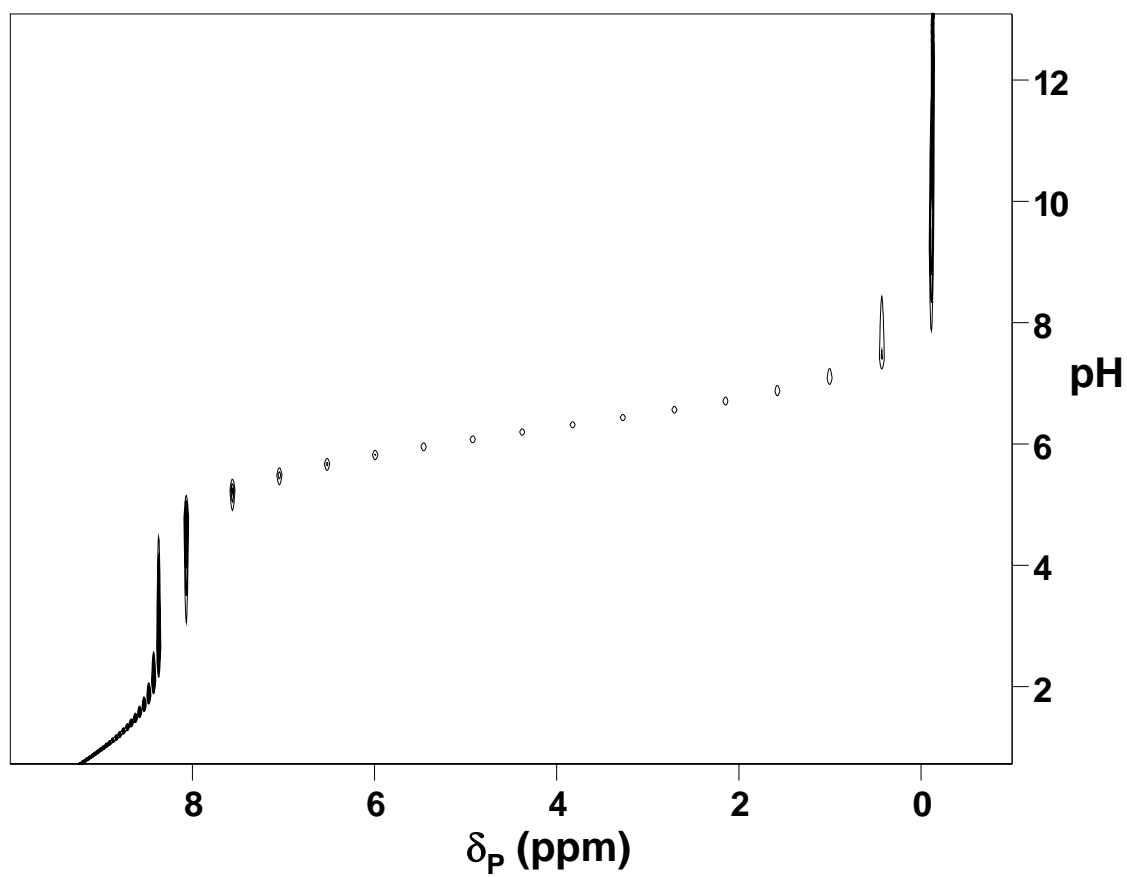

**Fig. S4.** 202 MHz  $^{31}\text{P}\{^1\text{H}\}$  NMR-controlled titration of **6** with 1 M TMAOH.  
Contour pH, $\delta_{\text{P}}$ -plot.

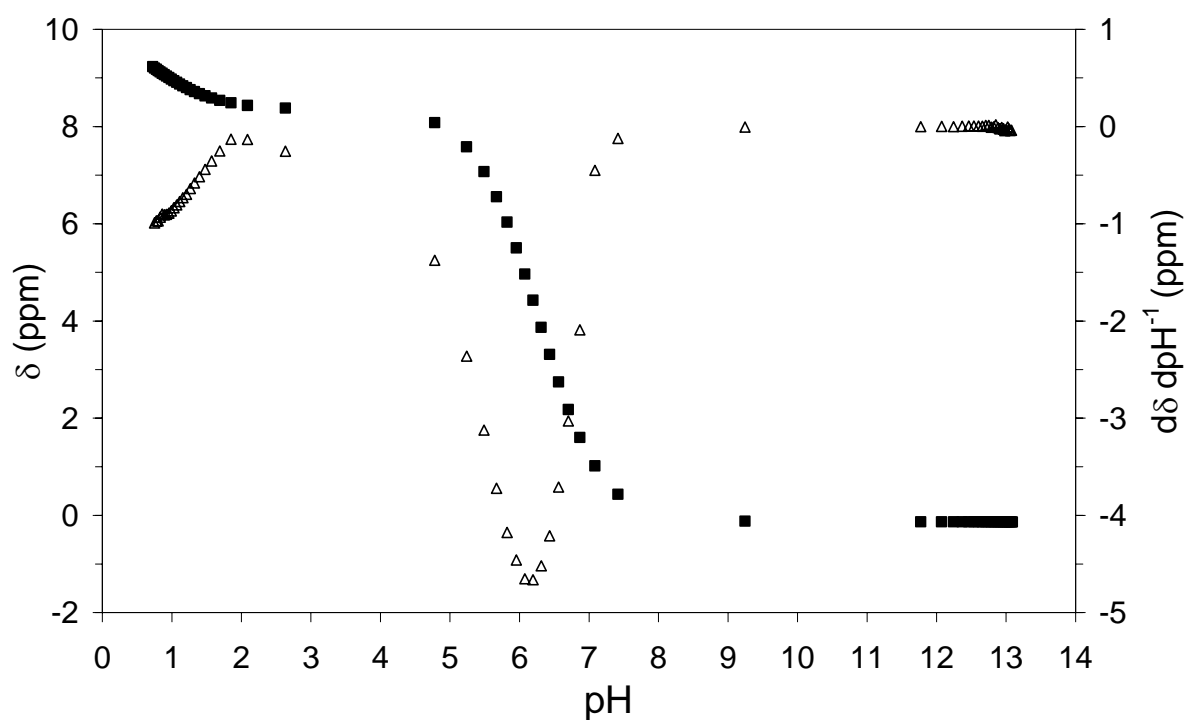

**Fig. S5.**  $\delta_P$  (square) and  $d\delta_P \text{ dpH}^{-1}$  (triangle) vs. pH from the 202 MHz  $^{31}\text{P}\{^1\text{H}\}$  NMR titration of **6**.

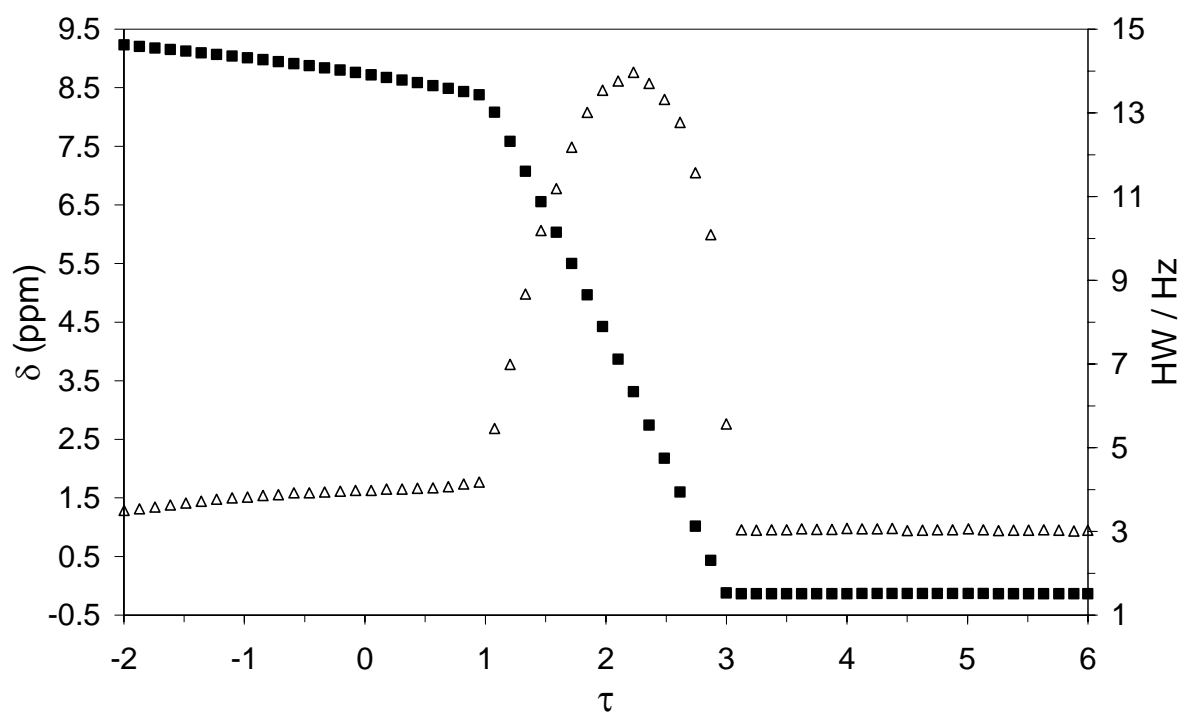

**Fig. S6.**  $\delta_P$  (square) and  $^{31}\text{P}$  spectral half-width HW (triangle) vs. degree of titration  $\tau$  from the 202 MHz  $^{31}\text{P}\{^1\text{H}\}$  NMR titration of **6**

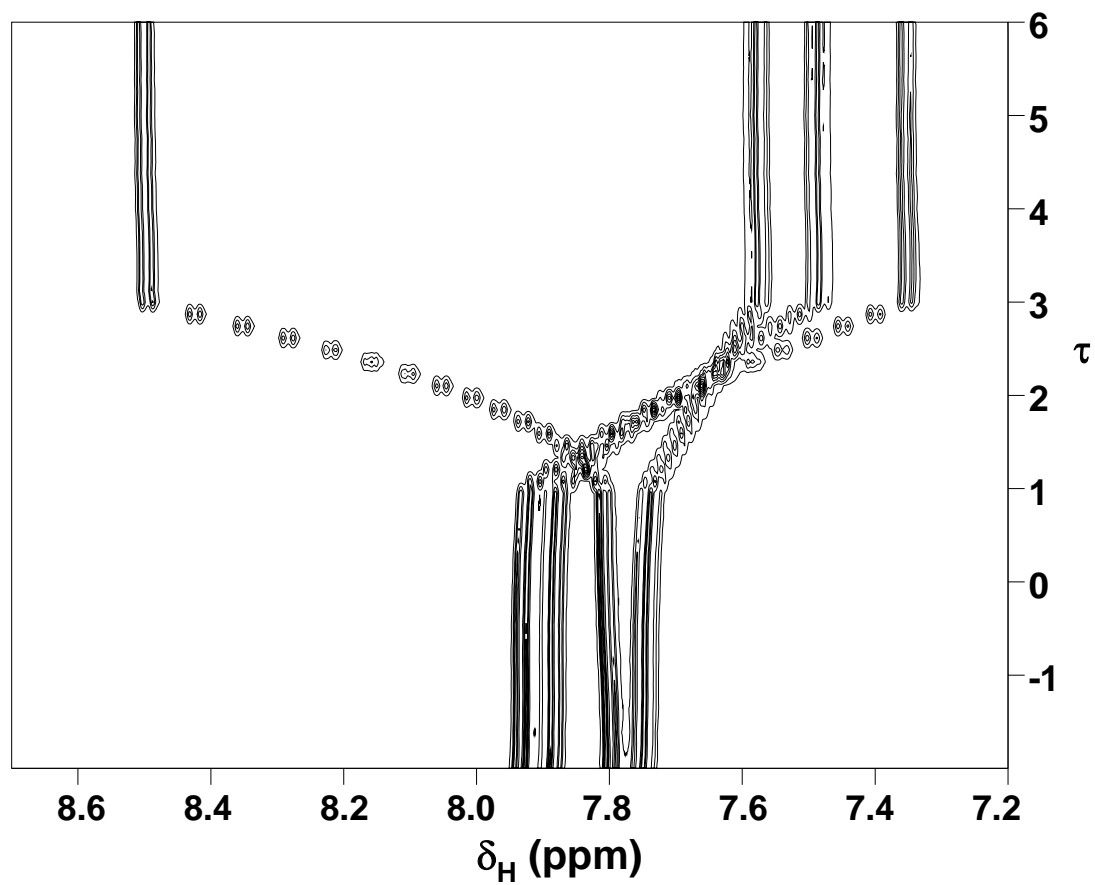

**Fig. S7.** 500 MHz  $^1\text{H}$  NMR-controlled titration of **6** with 1 M TMAOH. Contour  $\tau, \delta$ -plot

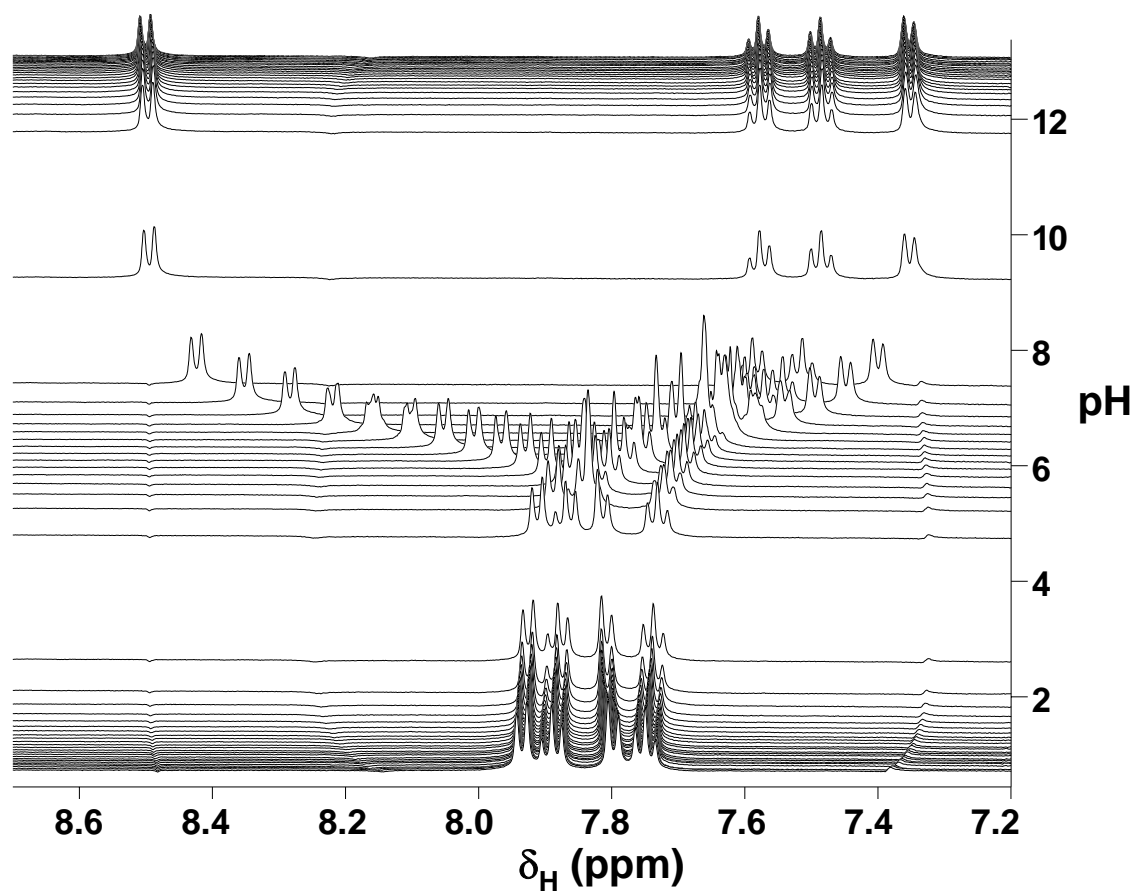

**Fig. S8.** 500 MHz <sup>1</sup>H NMR-controlled titration of **6** with 1 M TMAOH. Stacked pH, $\delta$ -plot



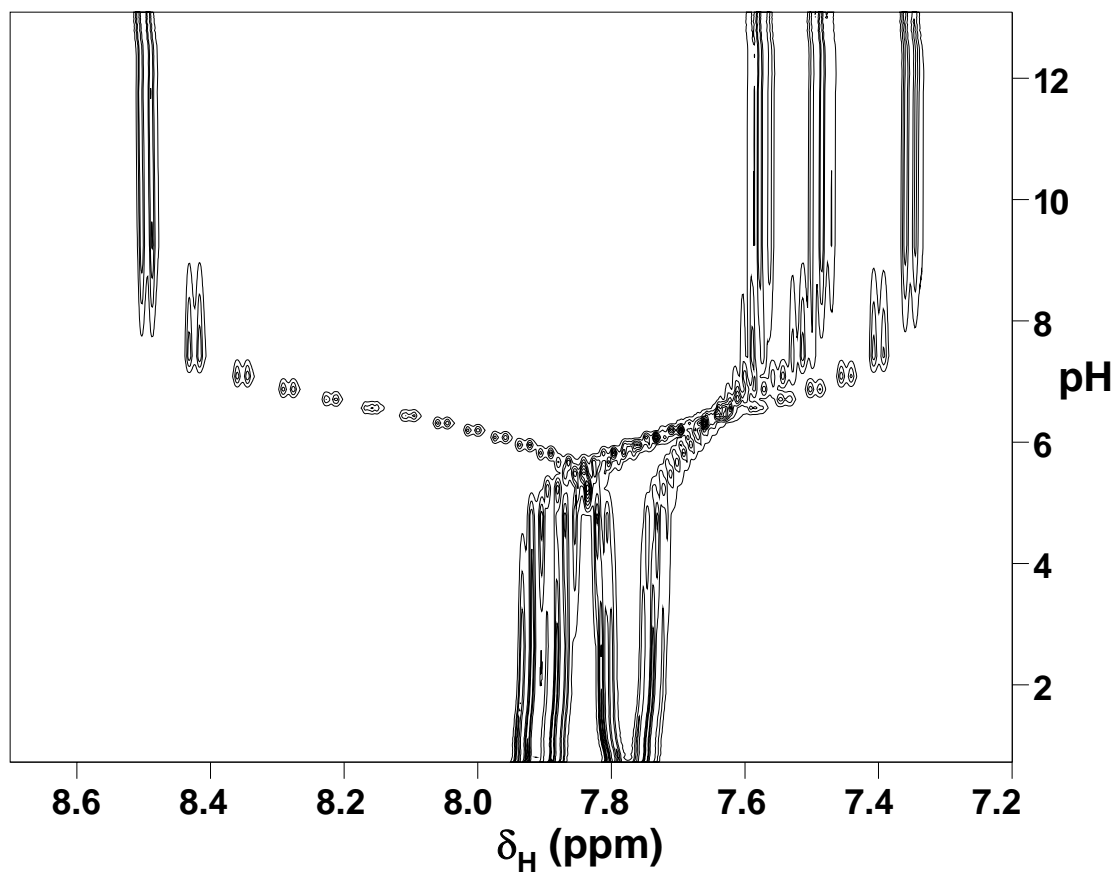

**Fig. S9.** 500 MHz  $^1\text{H}$  NMR-controlled titration of **6** with 1 M TMAOH. Contour pH, $\delta$ -plot

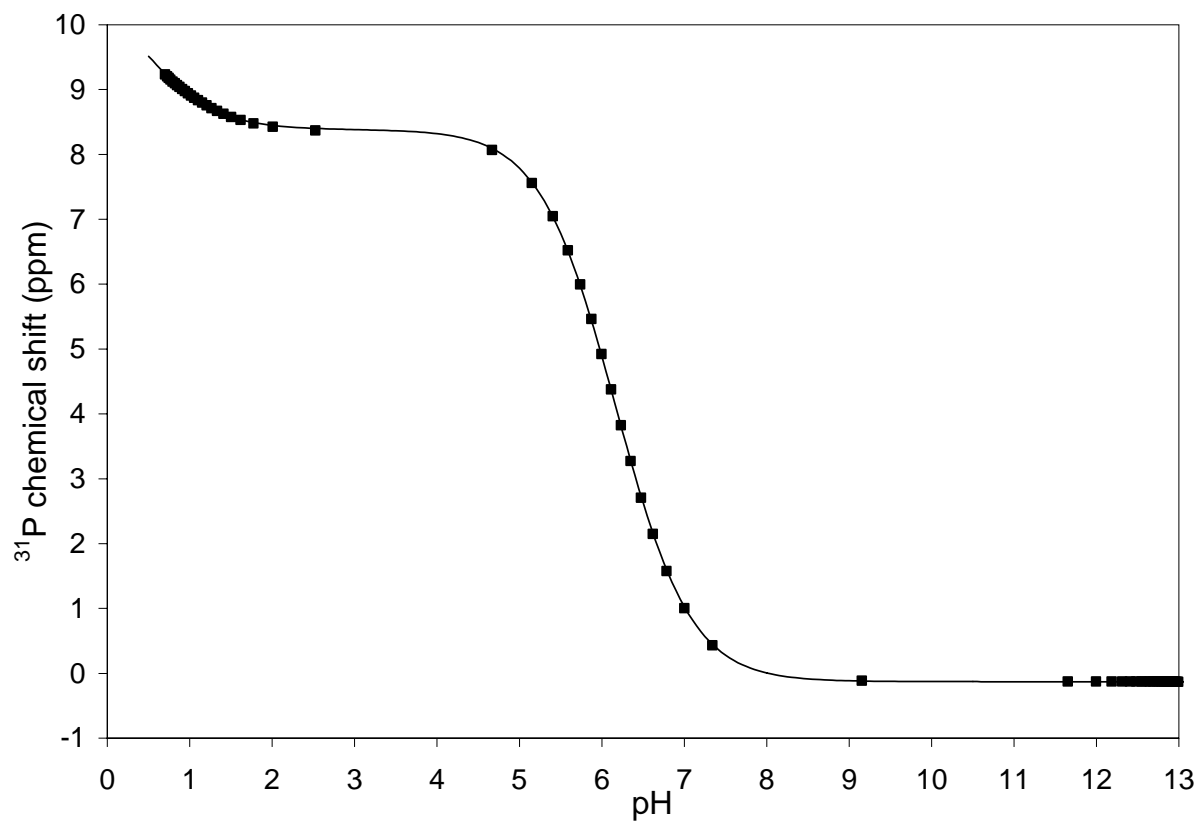

**Fig. S10.** 202 MHz  $^{31}\text{P}\{^1\text{H}\}$  NMR-controlled titration curve of **6** vs. TMAOH at 1 M ionic strength (TMACl), fitted by the OPIUM software

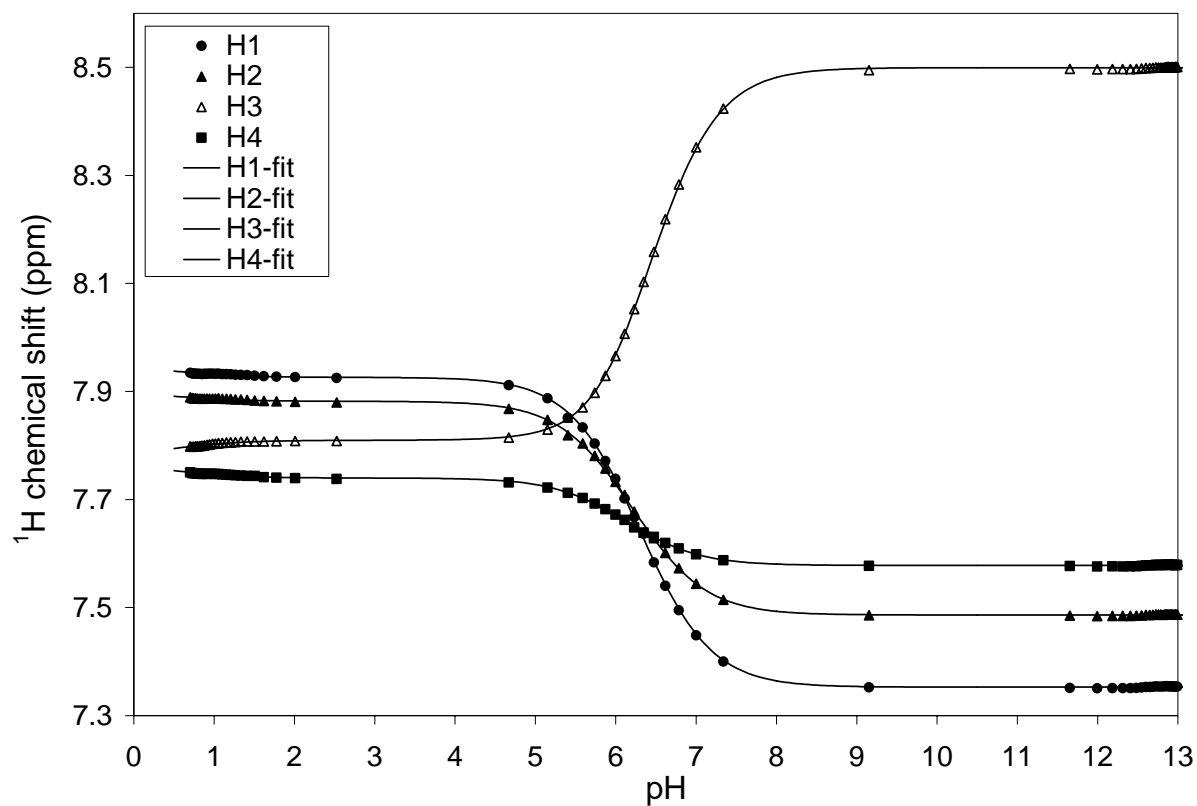

**Fig. S11.** 500 MHz  $^1\text{H}$  NMR-controlled titration curves of **6** vs. TMAOH at 1 M ionic strength (TMACl), fitted by the OPIUM software

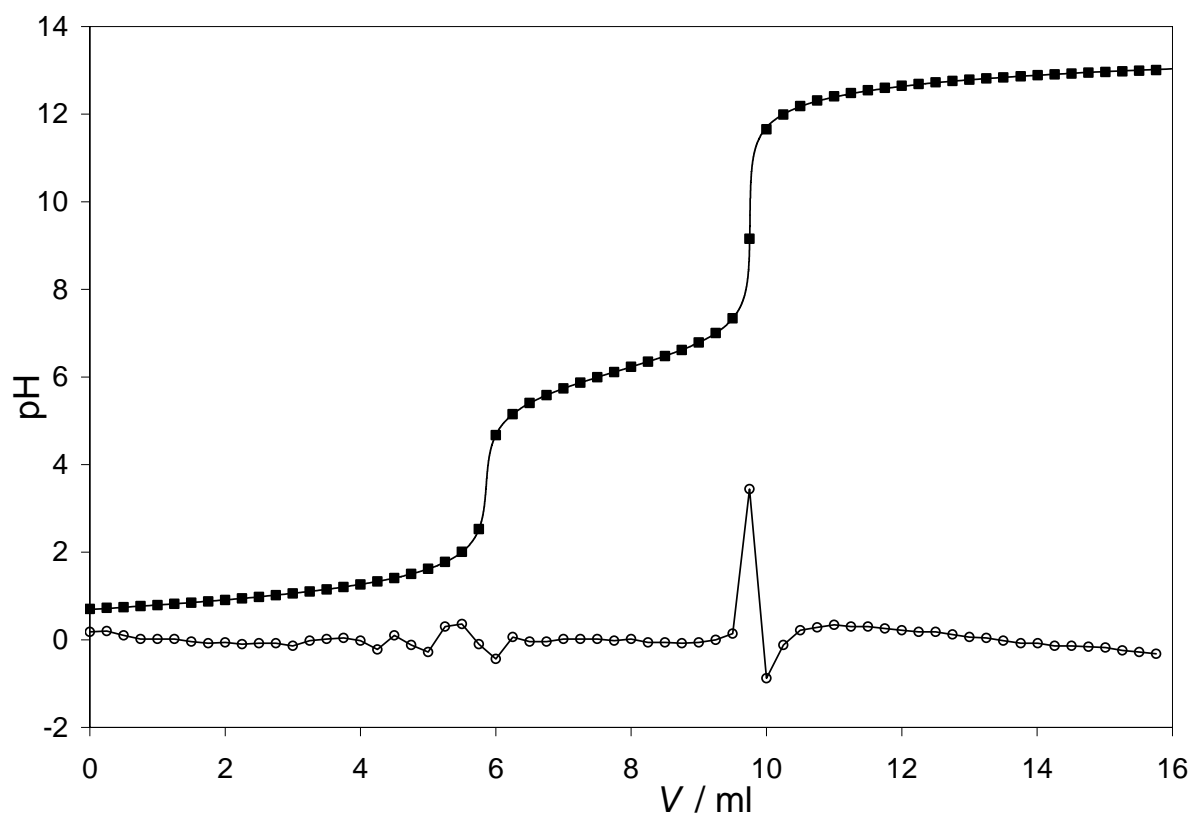

**Fig. S12.** Potentiometric titration curve, fitted by the OPIUM software from the 202 MHz  $^{31}\text{P}\{^1\text{H}\}$  NMR-controlled titration of **6** with TMAOH. The lower trace represents the (observed-calculated) residuals, plotted by using a magnification factor of 20.

**Table S1.**  $^1\text{H}$  and  $^{13}\text{C}$  chemical shift gradients,  $\Delta = \delta(\text{in KOD}) - \delta(\text{in D}_2\text{O})$  (ppm) of **6-8**, measured in  $\text{D}_2\text{O}$  and KOD solutions

|                      | <b>D<sub>2</sub>O / KOD</b> |  |                         | <b>D<sub>2</sub>O / KOD</b> |
|----------------------|-----------------------------|--|-------------------------|-----------------------------|
|                      | Gradient $\Delta$           |  |                         | Gradient $\Delta$           |
| <b>H<sub>1</sub></b> | - 0.5628                    |  | <b>C<sub>VI</sub></b>   | + 0.894                     |
| <b>H<sub>2</sub></b> | - 0.3867                    |  | <b>C<sub>III</sub></b>  | - 7.912                     |
| <b>H<sub>3</sub></b> | + 0.6447                    |  | <b>C<sub>VII</sub></b>  | + 7.549                     |
| <b>H<sub>4</sub></b> | - 0.1529                    |  | <b>C<sub>IV</sub></b>   | + 1.015                     |
|                      |                             |  | <b>C<sub>I</sub></b>    | +7.767                      |
|                      |                             |  | <b>C<sub>II</sub></b>   | -6.701                      |
|                      |                             |  | <b>C<sub>V</sub></b>    | +9.059                      |
|                      |                             |  | <b>C<sub>VIII</sub></b> | +111.993                    |

**Table S2.** 500 MHz  $^1\text{H}$  NMR parameters of 3-hydroxy-3-phosphonoisobenzofuranone (**6**):

a) 0.2510 M in  $\text{D}_2\text{O}$ ; b) 0.1010 M in 1 M KOD. Chemical shifts  $\delta_{\text{H}}$  (ppm), resonance frequencies  $\nu_{\text{H}}$  (Hz), coupling constants  $^n\text{J}_{\text{HH}}$  (Hz) and spectral half widths HW (Hz)

<sup>c</sup> n.i. = not iterated

| Solvent                |                          | $\text{D}_2\text{O}^{\text{a}}$             |                    | $\text{KOD}^{\text{b}}$ |              |
|------------------------|--------------------------|---------------------------------------------|--------------------|-------------------------|--------------|
| Species                |                          | $\text{H}_3\text{L} < \text{H}_2\text{L}^-$ |                    | $\text{L}^{3-}$         |              |
| $\delta_{\text{i}}$    | Type                     | Data                                        | Error              | Data                    | Error        |
| 1                      | $\delta_{\text{H}}$      | 7.9242                                      |                    | 7.3540                  |              |
| 2                      | $\delta_{\text{H}}$      | 7.8654                                      |                    | 7.4832                  |              |
| 3                      | $\delta_{\text{H}}$      | 7.7967                                      |                    | 8.4423                  |              |
| 4                      | $\delta_{\text{H}}$      | 7.7242                                      |                    | 7.5717                  |              |
| 5                      | $\delta_{\text{P}}$      | 9.398                                       |                    | -0.6386                 |              |
| $\nu_{\text{i}}$       | Type                     | Data                                        | Error              | Data                    | Error        |
| 1                      | $\nu_{\text{H}}$         | 3963.1894                                   | $\pm 0.0009$       | 3677.9346               | $\pm 0.0010$ |
| 2                      | $\nu_{\text{H}}$         | 3933.7422                                   | $\pm 0.0008$       | 3742.5942               | $\pm 0.0006$ |
| 3                      | $\nu_{\text{H}}$         | 3899.3410                                   | $\pm 0.0009$       | 4222.2400               | $\pm 0.0007$ |
| 4                      | $\nu_{\text{H}}$         | 3863.0805                                   | $\pm 0.0009$       | 3786.8131               | $\pm 0.0006$ |
| 5                      | $\nu_{\text{P}}$         | 1902.8221                                   | n. i. <sup>c</sup> | -129.2945               | n. i.        |
| $\text{J}_{\text{ik}}$ | Type                     | Data                                        | Error              | Data                    | Error        |
| 12                     | $^4\text{J}_{\text{HH}}$ | 1.0387                                      | $\pm 0.0010$       | 1.2611                  | $\pm 0.0009$ |
| 13                     | $^5\text{J}_{\text{HH}}$ | 0.8136                                      | $\pm 0.0041$       | 0.5820                  | $\pm 0.0007$ |
| 14                     | $^3\text{J}_{\text{HH}}$ | 7.7308                                      | $\pm 0.0012$       | 7.6065                  | $\pm 0.0013$ |
| 15                     | $^5\text{J}_{\text{PH}}$ | 0.7308                                      | $\pm 0.0035$       | 1.2932                  | $\pm 0.0022$ |
| 23                     | $^3\text{J}_{\text{HH}}$ | 7.7421                                      | $\pm 0.0012$       | 7.8928                  | $\pm 0.0009$ |
| 24                     | $^3\text{J}_{\text{HH}}$ | 7.4592                                      | $\pm 0.0013$       | 7.4479                  | $\pm 0.0012$ |
| 25                     | $^5\text{J}_{\text{PH}}$ | 0.2137                                      | $\pm 0.0048$       | 0.3392                  | $\pm 0.0021$ |
| 34                     | $^4\text{J}_{\text{HH}}$ | 0.8480                                      | $\pm 0.0080$       | 1.2202                  | $\pm 0.0006$ |
| 35                     | $^4\text{J}_{\text{PH}}$ | 1.0800                                      | $\pm 0.0054$       | 0.2183                  | $\pm 0.0021$ |
| 45                     | $^6\text{J}_{\text{PH}}$ | 0.9908                                      | $\pm 0.0086$       | 0.3228                  | $\pm 0.0017$ |
| Half width             | Type                     | Data                                        | Error              | Data                    | Error        |
| 1                      | $\text{HW}_{\text{H}}$   | 0.7976                                      | $\pm 0.0020$       | 0.7688                  | $\pm 0.0018$ |
| 2                      | $\text{HW}_{\text{H}}$   | 0.8057                                      | $\pm 0.0024$       | 0.6953                  | $\pm 0.0018$ |
| 3                      | $\text{HW}_{\text{H}}$   | 0.8300                                      | $\pm 0.0028$       | 0.6377                  | $\pm 0.0017$ |
| 4                      | $\text{HW}_{\text{H}}$   | 0.8409                                      | $\pm 0.0020$       | 0.7174                  | $\pm 0.0014$ |
| 5                      | $\text{HW}_{\text{P}}$   | 3.0630                                      | n. i.              | 2.0550                  | n. i.        |

**Table S3.** Chemical shifts  $\delta_C$  (ppm) monitored for six selected titration states of **6**.  
 a) aromatic carbons  $C_{III}$ ,  $C_{IV}$ ,  $C_{VI}$ ,  $C_{VII}$  connected to protons; b) aromatic carbons  $C_{II}$ ,  $C_V$  not connected to protons. c)  $C_I$  COOH / COO<sup>-</sup>; d)  $C_{VIII}$  COH / CO. n.o. = not observed. br = broad lines. vbr = very broad lines. Only a few coupling constants (Hz) were resolved:  $^1J_{PC}$  of  $C_{VIII}$ : 199.7 ( $\tau = 0$ ), 197.2 ( $\tau = 0.5$ ), 160.1 ( $\tau = 3$ );  $^2J_{PC}$  of  $C_{II}$ : 4.7 ( $\tau = 0$ ), 4.5 ( $\tau = 3$ );  $^3J_{PC}$  of  $C_V$ : 47.4 ( $\tau = 3$ ).

| $\tau$                  | 0                                            | 0.5    | 1         | 1.5         | 2         | 3      |
|-------------------------|----------------------------------------------|--------|-----------|-------------|-----------|--------|
|                         | <b>Chemical shifts <math>\delta_C</math></b> |        |           |             |           |        |
| <b>C<sub>I</sub></b>    | 173.91                                       | 174.21 | 174.62    | 175.66 br   | 178.25    | 181.82 |
| <b>C<sub>II</sub></b>   | 148.70                                       | 149.30 | 149.52 br | 148.56 vbr  | 144.75 br | 142.16 |
| <b>C<sub>III</sub></b>  | 138.32                                       | 138.20 | 137.91 br | 136.92 vbr  | 134.29 br | 130.39 |
| <b>C<sub>IV</sub></b>   | 134.05                                       | 133.83 | 133.65    | 133.59      | 134.03    | 135.02 |
| <b>C<sub>V</sub></b>    | 128.37                                       | 128.38 | 128.78 br | 129-132 vbr | 135.01 br | 137.40 |
| <b>C<sub>VI</sub></b>   | 128.23                                       | 128.12 | 128.07    | 128.14 br   | 128.50    | 129.14 |
| <b>C<sub>VII</sub></b>  | 126.60                                       | 126.58 | 126.74 br | 127.58 vbr  | 130.17 br | 134.16 |
| <b>C<sub>VIII</sub></b> | 107.10                                       | 107.84 | n.o.      | n.o.        | n.o.      | 219.43 |
